# Supplementary material for: Serum Metabolomics of Benign Essential Blepharospasm Using Liquid Chromatography and Orbitrap Mass Spectrometry
Source: PubMed Central journal article supplement (PMC9704060; doi:10.1155/2022/6876327), 2022-11-18
Supplement: 6876327.f1.pdf [file 6876327.f1.pdf]

**A**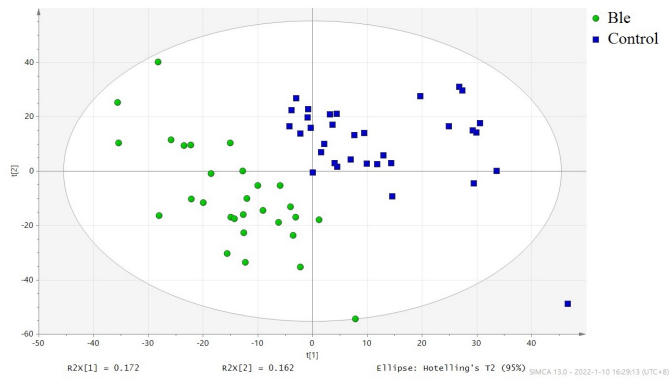**Positive ionization mode****B**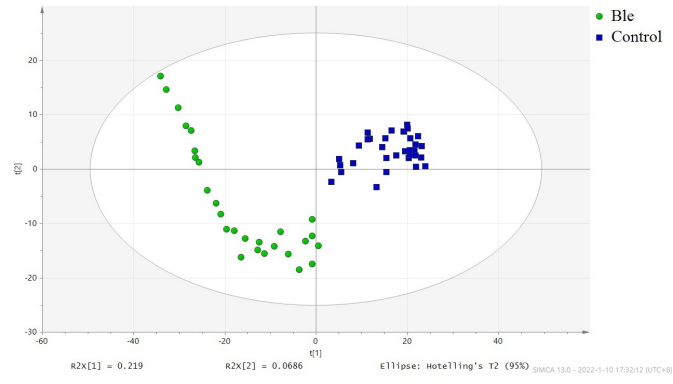**Negative ionization mode****C**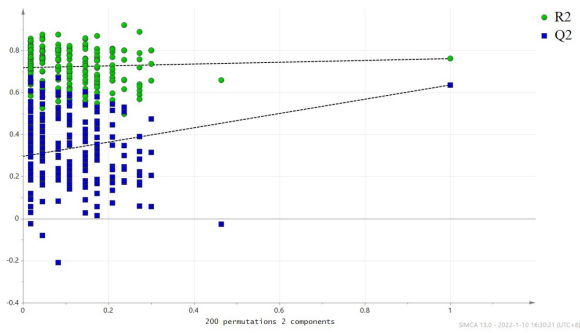**Positive ionization mode****D**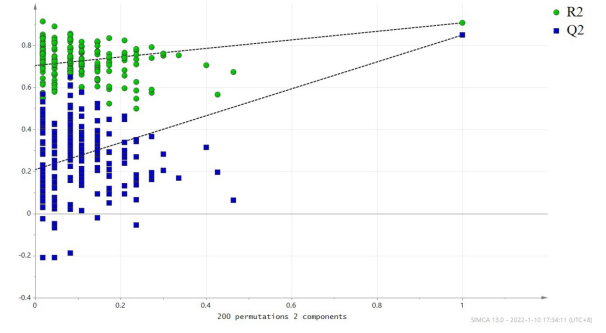**Negative ionization mode**
