# Supplementary figures and images for: Serum Metabolomics of Benign Essential Blepharospasm Using Liquid Chromatography and Orbitrap Mass Spectrometry
Source: PubMed Central journal article supplement (PMC9704060; doi:10.1155/2022/6876327), 2022-11-18

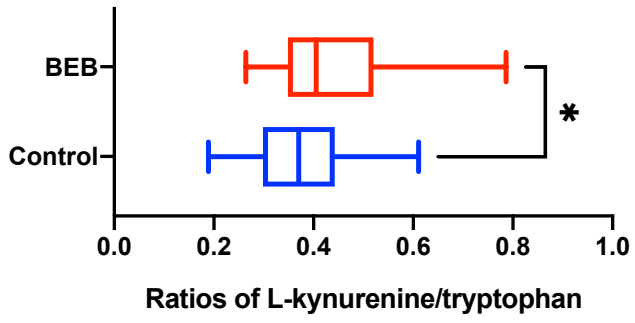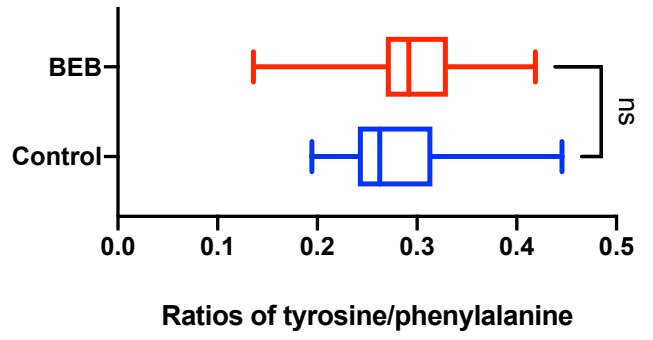

Supplement: 6876327.f2.pdf [file 6876327.f2.pdf]
